# Supplementary material for: Real-Time Visualization of the Mascagni-Sappey Pathway Utilizing ICG Lymphography
Source: PubMed Central journal article supplement (PMC7281680; doi:10.3390/cancers12051195), 2020-05-08
Supplement: cancers-12-01195-s001.pdf [file cancers-12-01195-s001.pdf]

Supplementary Materials

# Real-Time Visualization of the Mascagni-Sappey Pathway Utilizing ICG Lymphography

Anna Rose Johnson, Melisa D. Granoff, Hiroo Suami, Bernard T. Lee and Dhruv Singhal

Table S1. Patient Cohort Cancer Stage.

| Patient Cohort Cancer Stage $n = 23$ |                  |
|--------------------------------------|------------------|
| Cancer Stage                         | $n^{\wedge}$ (%) |
| IA                                   | 2 (9)            |
| IIA                                  | 6 (26)           |
| IIB                                  | 7 (30)           |
| IIIA                                 | 6 (26)           |
| IIIB                                 | 1 (4)            |
| IIIC                                 | 1 (4)            |

$n^{\wedge}$  = number of patients

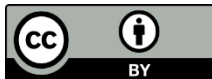

© 2020 by the authors. Licensee MDPI, Basel, Switzerland. This article is an open access article distributed under the terms and conditions of the Creative Commons Attribution (CC BY) license (<http://creativecommons.org/licenses/by/4.0/>).
